RESEARCH ARTICLE

# Transmission electron microscopic observation of body cuticle structures of phoretic and parasitic stages of *Parasitaphelenchinae* nematodes

Taisuke Ekino<sup>1,2</sup>, Toyoshi Yoshiga<sup>1,2</sup>, Yuko Takeuchi-Kaneko<sup>3</sup>, Natsumi Kanzaki<sup>4\*</sup>

**1** Laboratory of Nematology, Department of Applied Biological Sciences, Faculty of Agriculture, Saga University, Saga, Japan, **2** The United Graduate School of Agricultural Sciences, Kagoshima University, Kagoshima, Japan, **3** Graduate School of Agriculture, Kyoto University, Sakyo-ku, Kyoto, Japan, **4** Forestry and Forest Products Research Institute, Tsukuba, Ibaraki, Japan

✉ Current address: Kansai Research Center, Forestry and Forest Products Research Institute, Fushimi, Kyoto, Japan

\* [nkanzaki@affrc.go.jp](mailto:nkanzaki@affrc.go.jp)

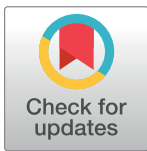

**OPEN ACCESS**

**Citation:** Ekino T, Yoshiga T, Takeuchi-Kaneko Y, Kanzaki N (2017) Transmission electron microscopic observation of body cuticle structures of phoretic and parasitic stages of *Parasitaphelenchinae* nematodes. PLoS ONE 12(6): e0179465. <https://doi.org/10.1371/journal.pone.0179465>

**Editor:** Daniel Doucet, Natural Resources Canada, CANADA

**Received:** March 30, 2017

**Accepted:** May 29, 2017

**Published:** June 16, 2017

**Copyright:** © 2017 Ekino et al. This is an open access article distributed under the terms of the [Creative Commons Attribution License](https://creativecommons.org/licenses/by/4.0/), which permits unrestricted use, distribution, and reproduction in any medium, provided the original author and source are credited.

**Data Availability Statement:** All relevant data are within the paper.

**Funding:** This study was supported in part by the Grants-in-Aid for Scientific Research (B), Nos. 15H04514, 26292178 and 17H03831 from the Japan Society for the Promotion of Science and Environment Research. The funder had no role in study design, data collection and analysis, decision to publish, or preparation of the manuscript.

## Abstract

Using transmission electron microscopy, we examined the body cuticle ultrastructures of phoretic and parasitic stages of the parasitaphelenchid nematodes *Bursaphelenchus xylophilus*, *B. conicaudatus*, *B. luxuriosae*, *B. rainulfi*; an unidentified *Bursaphelenchus* species, and an unidentified *Parasitaphelenchus* species. Nematode body cuticles usually consist of three zones, a cortical zone, a median zone, and a basal zone. The phoretic stages of *Bursaphelenchus* spp., isolated from the tracheal systems of longhorn beetles or the elytra of bark beetles, have a thick and radially striated basal zone. In contrast, the parasitic stage of *Parasitaphelenchus* sp., isolated from bark beetle hemocoel, has no radial striations in the basal zone. This difference probably reflects the peculiar ecological characteristics of the phoretic stage. A well-developed basal radially striated zone, composed of very closely linked proteins, is the zone closest to the body wall muscle. Therefore, the striation is necessary for the phoretic species to be able to seek, enter, and depart from host/carrier insects, but is not essential for internal parasites in parasitaphelenchid nematodes. Phylogenetic relationships inferred from near-full-length small subunit ribosomal RNA sequences suggest that the cuticle structures of parasitic species have apomorphic characters, e.g., lack of striation in the basal zone, concurrent with the evolution of insect parasitism from a phoretic life history.

## Introduction

In general, ecdysozoan animals have a more or less sclerotized exoskeleton, which protects their soft tissues from biotic and abiotic factors such as desiccation, osmotic shock, predators, and parasites [1–3]. Nematodes, one of the most divergent animal phyla, also have a cuticular

**Competing interests:** The authors have declared that no competing interests exist.

body surface consisting of collagenous protein material [4, 5]. The nematode cuticle is, as for other phyla, one of the most important structures in its body plan. The complex extracellular matrix covering the outermost layer acts as an antagonist to the high internal body pressure and contraction of the longitudinal body muscles [6]. In addition, the body cuticle not only provides shape to its body as also aids mobility and sensing environmental conditions [6]. The nematode cuticle structure is extremely variable, not only among different taxa but also between sexes and across the developmental stages within a species [7–9], reflecting its function in adaptation [10]. However, the functional morphology of the nematode body cuticle is not yet sufficiently understood, largely because of its incredible diversity.

In the present study, we examined the body cuticle structure of several parasitaphelenchid (subfamily Parasitaphelenchinae) nematodes, focusing on stages that define their association with their host/carrier insects. The Parasitaphelenchinae nematodes are mostly associated with coleopteran and hymenopteran insects as their phoretic or parasitic hosts. Bark beetles are the most common hosts of this subfamily [11–13], but their associations with ambrosia beetles [14], weevils [15, 16], longhorn beetles [17–19], nitidulids [20], stag beetles [21], and soil-dwelling bees [22, 23] have also been reported across the world. These nematodes have dauer (dormant) or parasitic juvenile stages. For example, dauer juveniles of *Bursaphelenchus* spp. usually stick to the undersurface of the elytra of bark beetles [24, 25] and are capable of entering the tracheal systems of longhorn beetles and weevils [17–19] or the reproductive organs or oviducts, poison sacs, and/or Dufour's glands of teneral adult digger bees [22, 26, 27]. By contrast, parasitic *Parasitaphelenchus* juveniles enter the hemocoel of insect larvae, pupae, and teneral adults [28–30].

The subfamily contains two lethal plant pathogens, *B. xylophilus* and *B. cocophilus*, associated with *Monochamus* longhorn beetles as dauer juveniles and with palm weevils as parasitic juveniles [15, 17]. Therefore, the host associations of parasitaphelenchid nematodes are of interest not only for their biological significance but also for disease control.

We investigated the body cuticle ultrastructures of parasitaphelenchid nematodes in relation to their association with insects (as dauer or parasitic juveniles and parasitic adults). We focused on the organs harboring nematodes, dependency on insects (phoresy or parasitism), and nematode developmental stage (juvenile or adult) to understand whether body cuticle structures correspond to these behavioral and/or physiological characteristics. We also compared these structural differences to understand the phylogenetic relationships of nematodes in an evolutionary context.

## Materials and methods

### Insect collection and nematode isolation

Five species of coleopteran insects were collected, dissected to identify parasitaphelenchid nematodes, and examined.

Adult specimens of *Psacotheta hilaris* and *Acalolepta luxuriosa* were collected in June 2016 from a mulberry field at the experimental farm of the Kyoto Institute of Technology, Kyoto, Japan (35°01'27" N, 135°41'02" E, 45 m above sea level [a.s.l.]) and from *Aralia elata* cultivated at an experimental nursery at the Forestry and Forest Products Research Institute (FFPRI), Ibaraki, Japan (36°00'23" N, 140°07'33" E, 24 m a.s.l.), respectively.

Newly emerged *Monochamus alternatus* adults were collected from a dead *Pinus densiflora* log in May 2016. The logs were obtained from the Tama Forest Science Garden, FFPRI, Hachioji, Tokyo, Japan (35°38'44" N, 139°16'48" E, 184 m a.s.l.), and placed in a wire mesh cage in an experimental field at FFPRI.

To isolate bark beetles (*Dryocoetes uniseriatus* and *Alniphagus costatus*), dead logs obtained from the field were individually enclosed in nylon mesh bags and kept in a wire mesh cage in the FFRPI experimental field. When adult beetles emerged, they were collected using an aspirator. Adult specimens of *D. uniseriatus* emerged in May 2016 from a dead *P. densiflora* log obtained in May 2016 from the Chiyoda Experimental Nursery of FFRPI, Kasumigaura, Ibaraki, Japan (36°11'11" N, 140°12'55" E, 42 m a.s.l.). Adult specimens of *A. costatus* emerged in July 2016 from several *Alnus serrulatooides* logs obtained in May 2016 from the Sugadaira Montane Research Center, University of Tsukuba, Nagano, Japan (36°31'09" N, 138°21'00" E, 1300 m a.s.l.).

More than 10 individuals were collected for each of three longhorn beetle species, and more than 100 individuals of both bark beetle species emerged and examined.

A collection permit was not necessary for *A. luxuriosa*, *M. alternatus*, or *D. uniseriatus*, because those were obtained from the experimental field belonging to FFRPI. The collection of *P. hylaris* and *A. costatus* was permitted by the Kyoto Institute of Technology (Dr. T. Akino) and the University of Tsukuba (Dr. Y. Degawa), respectively.

The insects obtained were identified visually and dissected under a light microscope (S8 Apo, Leica). When nematodes were observed, the organs that harbored these were recorded. Then the developmental stages of nematodes (phoretic [dauer] juvenile, parasitic juvenile, or "parasitic" adult) were observed under a light microscope (Eclipse 80i, Nikon, 200 or 400 X). Phoretic and parasitic stages of nematodes were obtained from one individual each of *P. hylaris*, *A. luxuriosa* and *A. costatus*, two individuals of *M. alternatus* and three individuals of *D. uniseriatus*. The observed nematode individuals were then saved for molecular identification as described below.

Isolated nematodes were either fixed for transmission electron microscopic (TEM) observations as described below, or transferred to 2.0% malt extract agar previously inoculated with gray mold, *Botrytis cinerea*, to examine their developmental stage (marked third or fourth stage).

## Molecular identification and phylogeny

DNA material was prepared from each nematode species following the methods of Kikuchi *et al.* [31] and Tanaka *et al.* [32]. In brief, a single individual nematode was handpicked from a culture plate or a dissected insect, morphologically observed, and digested in 30  $\mu$ L nematode digestion buffer at 55°C for 20 min. Nematode lysate served as the polymerase chain reaction (PCR) template. The DNA base sequences of partial ribosomal DNAs, ca. 1.6 kb of nearly-full-length small subunit (SSU) and ca. 750 bp of D2–D3 expansion segments of large subunit, were determined for each isolate following the methods of Kanzaki and Futai [33] and Ye *et al.* [34] with direct PCR sequencing. The sequences obtained were compared with those in the GenBank database ([http://www.genome.jp/dbget-bin/www\\_bfind?genbank-today](http://www.genome.jp/dbget-bin/www_bfind?genbank-today)).

The molecular phylogenetic relationships of the obtained species were inferred from SSU using Bayesian inference (BI) and maximum likelihood (ML) analyses. The compared sequences were aligned using the MAFFT multiple sequence alignment program [35] (<http://mafft.cbrc.jp/alignment/software/>), and the base substitution model was determined using the MODELTEST program version 3.7 [36] under the Akaike information criterion (AIC) and the GTR+I+G model was selected for the analysis. The Akaike-based model, log likelihood (lnL), AIC values, proportion of invariable sites, gamma distribution shape parameters, and substitution rates were adopted for both BI and ML analyses. Bayesian analyses were performed using MrBayes 3.2 software [37, 38] by running four chains for  $4 \times 10^6$  generations. Markov chains were sampled at intervals of 100 generations [39]. Two independent runs were performed and,

after confirming the convergence of runs and discarding the first  $2 \times 10^6$  generations as burn-in, the remaining topologies were used to generate a 50% majority-rule consensus tree. PhyML 3.0 software [40] (<http://www.atgc-montpellier.fr/phyml/>) was employed for ML analyses. The tree topology was evaluated with 1,000 bootstrap pseudoreplications.

## Observation of body cuticle ultrastructure

Samples for transmission electron microscopy were prepared following the method of Kadoya [41] with some modifications. Phoretic or parasitic stages of nematodes were fixed in 1% glutaraldehyde and 0.6% sucrose in 0.1 M phosphate buffer (pH 7.4) for more than 24 h. The head or tail regions were cut off and left in the same fixative for more than 24 h. After rinsing in the same buffer (six times, 10 min each), the nematodes were post-fixed in 1% osmium tetroxide for 90 min in the same buffer. The fixed nematodes were dehydrated in a graded ethanol series (50%, 70%, 80%, 90%, and three times with 99.5%). Then they were cleaned with propylene oxide (three times, 10 min each) and infiltrated overnight in a mixture of 50% Eponate resin and 50% propylene oxide and an undiluted resin. Finally, the nematodes were embedded in Eponate resin. Their mid-body regions were sectioned with a diamond knife in an ultramicrotome. Sections were collected on formvar-coated copper grids for electron microscopy. The grids were stained with EM stainer (Nisshin EM Co.) for 30 min followed by lead citrate for 5 min. Grid-mounted sections were examined and photographed at 200 kV using a JEOL JEM-2000EX transmission electron microscope. Measurements were taken from body cuticle photographs for zones that were clearly observed. The thickness of each zone and total thickness of the cuticle were measured using the ImageJ program [42] (<https://imagej.nih.gov/ij/>).

We analyzed differences in cuticle thickness among all species and the thickness of the cuticle zone (%) among *Bursaphelenchus* spp. using the Steel-Dwass test.

## Results

### Nematode isolation

A dome-shaped lip region and less-developed median bulb, are typical morphological characters of insect associated forms of parasitaphelenchids [30, 43–45]. Thus, the nematodes with those characters were chosen as candidate phoretic or parasitic juveniles. Nematodes of *B. luxuriosae* obtained from *A. luxuriosa* tracheas were identified as “parasitic adults” based on a dome-shaped lip region, well-developed median bulb, and fully developed reproductive system (vulva or spicule) [19, 44, 45]. The parasitic juveniles isolated from the hemocoel of *A. costatus* had hooks on both the anterior and posterior ends of the body, suggestive of a typical parasitic juvenile form of the genus *Parasitaphelenchus* [30].

The nematode stages (phoretic juvenile, parasitic juvenile, or parasitic adult), insect vectors, and insect organs that harbored nematodes are summarized in Table 1. The dauer juveniles of *B. xylophilus* and *B. conicaudatus* and “parasitic” adults of *B. luxuriosae*, were isolated from the tracheas of *M. alternatus*, *P. hiliaris* and *A. luxuriosa* respectively. The dauer juveniles of *B. rainulfi* and the undescribed *Bursaphelenchus* sp. were isolated from the backs of elytra of *D. uniceriatus* and *A. costatus*, respectively. Parasitic juveniles of the undescribed *Parasitaphelenchus* sp. were isolated from the hemocoel of *A. costatus*.

The dauer juveniles of *B. xylophilus* and *B. conicaudatus* were in the fourth stage of dispersion, as previously described [46, 47]. The dauer juveniles of *B. rainulfi* and the *Bursaphelenchus* sp. and the parasitic juveniles of the *Parasitaphelenchus* sp. were third stage, which molted to the fourth stage within a week after transfer to the culture plate.

**Table 1. Species, stages, insect vectors, and insect organs harboring nematodes.**

| Species                           | Stage                          | Insect vector                               | Insect organ harboring nematodes |
|-----------------------------------|--------------------------------|---------------------------------------------|----------------------------------|
| <i>Bursaphelenchus xylophilus</i> | Fourth stage phoretic juvenile | <i>Monochamus alternatus</i> (Cerambycidae) | Trachea                          |
| <i>B. conicaudatus</i>            | Fourth stage phoretic juvenile | <i>Psacotheta hilaris</i> (Cerambycidae)    | Trachea                          |
| <i>B. luxuriosae</i>              | “Parasitic” adult              | <i>Acalolepta luxuriosa</i> (Cerambycidae)  | Trachea                          |
| <i>B. rainulfi</i>                | Third stage phoretic juvenile  | <i>Dryocoetes uniseriatus</i> (Scolytidae)  | Under the elytra                 |
| <i>Bursaphelenchus</i> sp.        | Third stage phoretic juvenile  | <i>Alniphagus costatus</i> (Scolytidae)     | Under the elytra                 |
| <i>Parasitaphelenchus</i> sp.     | Third stage parasitic juvenile | <i>Alniphagus costatus</i> (Scolytidae)     | Hemocoel                         |

<https://doi.org/10.1371/journal.pone.0179465.t001>

## Molecular identification and phylogeny

The SSU sequences of *B. xylophilus*, *B. conicaudatus*, *B. luxuriosae*, and *B. rainulfi* were almost identical to those of other population(s) of the same species deposited in the GenBank database (SSUs showed 100% identity with AY508034, 99% identity with AM397011, 99% identity with AB097864, and 99% identity with AM397017, respectively).

Based on SSU sequences, the *Bursaphelenchus* sp. obtained from the elytra of *A. serrulatooides* belongs to clade 1 *sensu* Kanzaki & Giblin-Davis [12] and is closely related to the *B. eggersi* and *B. eremus* groups [48], e.g., *B. eggersi* (AY508013), *B. clavicauda* (AB067757), and *B. hidegardae* (AM397013) (Fig 1). *Parasitaphelenchus* sp. is a member of clade 2 of the subfamily (*≈ Bursaphelenchus*) *sensu* Kanzaki & Giblin-Davis [12] and is closely related to *B. cocophilus* (AY509153) and *B. platzeri* (HQ599188) (Fig 1), i.e., the “genus” *Parasitaphelenchus* is phylogenetically a part of a larger “genus” *Bursaphelenchus*.

## Observation of body cuticle ultrastructure

The body cuticle structures of the phoretic and parasitic stages of the parasitaphelenchid species were observed via transmission electron microscopy. The structures of these species can be divided into two types, marked as types 1 and 2.

The structure of type 1 cuticle is the same as the one previously reported for dispersal fourth-stage juveniles of *B. xylophilus* [49] (Figs 2, 3A and 3B). Type 1 consists of three parts: a triple-layered epicuticle, a cortical zone, and a basal zone. No median zone was observed in propagative juveniles, adults, or dispersal third-stage juveniles [49]. The epicuticle consists of an electron-dense outermost layer (surface coat) and double inner layers. The cortical zone is an electron-lucent, amorphous zone. The basal zone is radially striated (hereinafter referred to as “striated”) and distinguishable from the cortical layer. All *Bursaphelenchus* spp. dauer juveniles and “parasitic” adult forms have type 1 cuticle structures. The thickness of each zone and the ratio of each zone to the total cuticle are summarized in Table 2. There were no significant differences ( $P < 0.05$ ) in total cuticle thickness among all compared species nor in the thickness (%) of the cuticle zone among *Bursaphelenchus* spp. The basal striated zone in all *Bursaphelenchus* spp. constitutes the largest proportion (about 50%) of the total cuticle thickness.

By contrast, type 2 cuticle (*Parasitaphelenchus* sp.) is characterized by two zones: a triple-layered external epicuticle and an amorphous zone (Fig 3C). The epicuticle consists of an electron-dense outermost layer (surface coat) and double inner layers. The surface coat is faintly stained and unclear. Because the basal zone of type 2 cuticle does not have striation patterns, the cortical, median, and basal zones are not clearly distinct and are composed of an amorphous zone. The thicknesses of an inner double-layered epicuticle and an amorphous zone (cortical, median, and basal zones) and the ratio of each zone to the total cuticle are shown in Table 2.

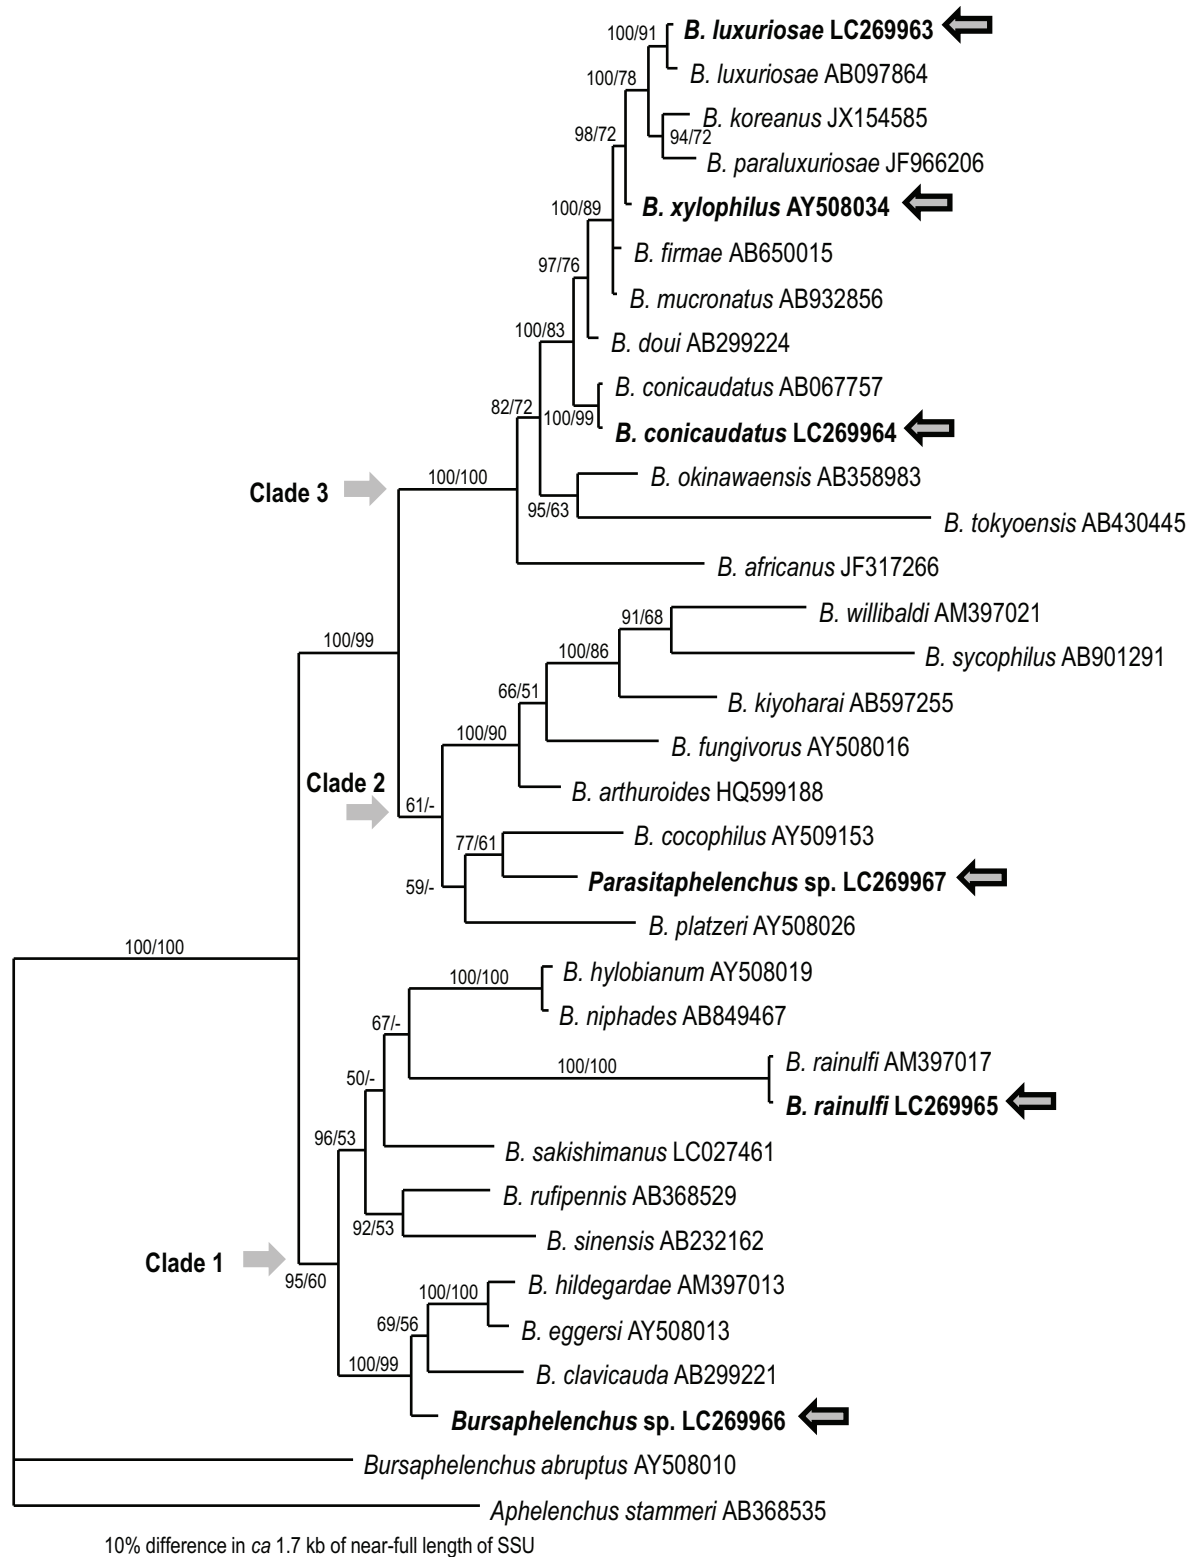

**Fig 1. Bayesian inference (BI) tree inferred from near-full-length SSU under the GTR+I+G model.** Analytical parameters are as follows: lnL = 6581.5269; freqA = 0.2615; freqC = 0.1826; freqG = 0.2598; freqT = 0.2961; R(a) = 1.0857; R(b) = 3.0396; R(c) = 1.3291; R(d) = 0.4709; R(e) = 6.0774; R(f) = 1; Pinva = 0.6408; Shape = 0.5838. BI posterior probability and bootstrap values obtained from an independent maximum likelihood (ML) analysis exceeding 50% are given on appropriate clades. Values lower than 50% are shown by “-”.

<https://doi.org/10.1371/journal.pone.0179465.g001>



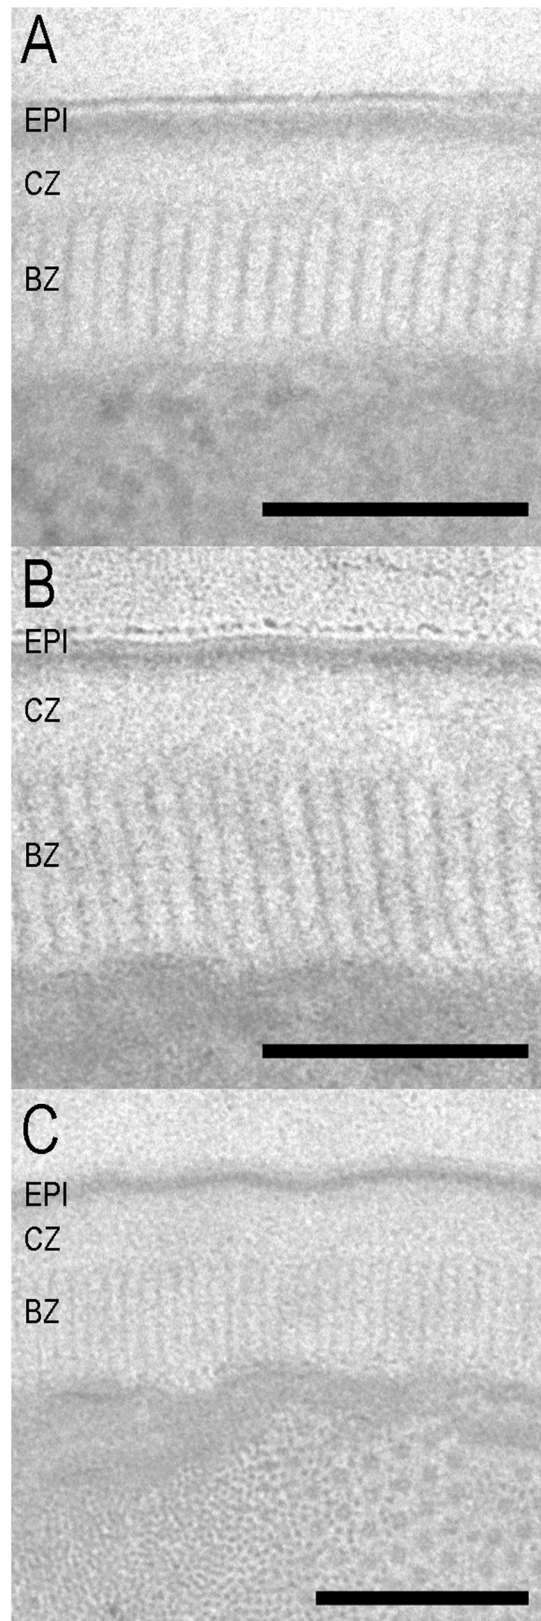

**Fig 2. Ultrastructure of the body cuticle of phoretic stages of Parasitaphelenchinae species.** A: *B. rainulfi*; B: *Bursaphelenchus* sp.; C: *B. conicaudatus*; EPI = epicuticle; CZ = cortical zone; BZ = basal zone. Scale bar = 200 nm.

<https://doi.org/10.1371/journal.pone.0179465.g002>

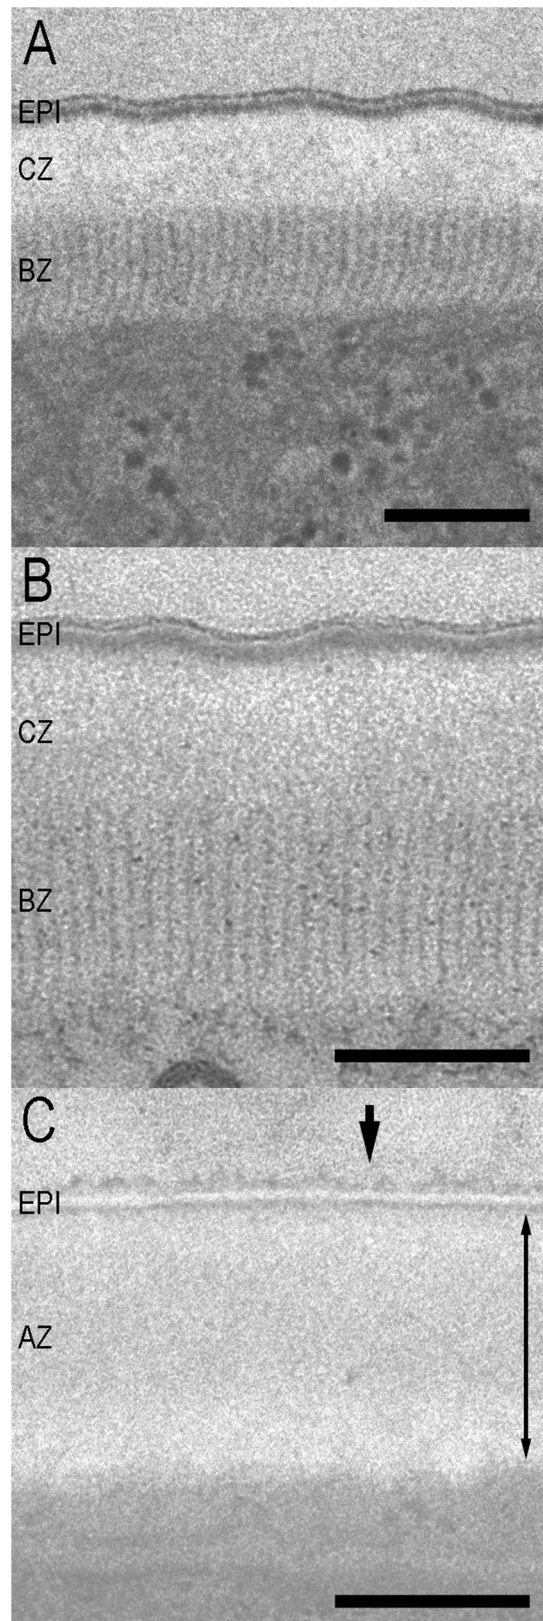

**Fig 3. Ultrastructure of the body cuticle of parasitic stages of Parasitaphelenchinae species.** A: parasitic male of *B. luxuriosae*; B: parasitic female of *B. luxuriosae*; C: parasitic juvenile of



*Parasitaphelenchus* sp. Arrowhead suggests the faintly stained surface coat. The thickness of the amorphous zone is indicated by the double-headed arrow. EPI = epicuticle; CZ = cortical zone; BZ = basal zone; AZ = amorphous zone. Scale bar = 200 nm.

<https://doi.org/10.1371/journal.pone.0179465.g003>

## Discussion

We obtained primary information on the body cuticle structure of phoretic and parasitic stages of Parasitaphelenchinae species and compared the structures in relation to their biological (mostly behavioral) characteristics and phylogenetic contexts.

The body cuticle structures of dauer juveniles of four *Bursaphelenchus* spp. (*B. xylophilus*, *B. conicaudatus*, *B. rainulfi*, and an undescribed *Bursaphelenchus* sp.) and the parasitic adult form of *B. luxuriosae* are similar (type 1), but differ from the parasitic juveniles of an unidentified *Parasitaphelenchus* sp. (type 2).

Kondo and Ishibashi [49] examined the body cuticle structures of dauer juveniles, propagative juveniles, and adult pine wood nematode, *B. xylophilus*, and found that the relative thickness of the basal striated zone of dauer juveniles (phoretic stage) is clearly higher (~67% of total cuticle) as compared to that of other juveniles and adult stages (~27–40%). In the present study, the relative thickness of the basal striated zone in dauer juveniles and parasitic adult forms is around 50% regardless of species (Table 2), thinner than the value reported by Kondo and Ishibashi [49]. We do not have a clear explanation for this difference; however, the relatively thick basal striated zone is common among all insect-dependent forms of *Bursaphelenchus* spp. Generally, the basal striated zone is composed of highly resistant proteins with very close linkage [50], and striation is usually found when nematodes are exposed to hazardous environments (e.g., desiccation, chemicals, variation in osmotic pressure, and mechanical pressure from soil particles) [8, 9, 51, 52]. Therefore, the basal striated zone of these stages is hypothesized to provide resistance to such environments [9, 10]. Furthermore, the basal

**Table 2. Measurement of cuticle thickness and the ratio of cuticle zone thickness to total cuticle thickness of phoretic and parasitic stage Parasitaphelenchinae species.**

| Species                            | n | Thickness of cuticle (nm) ± S.E. | Percentage of the thickness of the cuticle zones in a form, % (range) |                     |                     |
|------------------------------------|---|----------------------------------|-----------------------------------------------------------------------|---------------------|---------------------|
|                                    |   |                                  | EPI                                                                   | CZ                  | BZ                  |
| <i>Bursaphelenchus. xylophilus</i> | 5 | 238.2 ± 5.2                      | 13.0<br>(10.9–15.0)                                                   | 34.0<br>(28.5–39.1) | 53.0<br>(48.9–56.5) |
| <i>B. conicaudatus</i>             | 5 | 240.6 ± 10.6                     | 12.3<br>(11.1–16.7)                                                   | 34.3<br>(30.4–37.4) | 53.4<br>(51.0–58.5) |
| <i>B. luxuriosae</i> (PM)          | 5 | 272.2 ± 6.9                      | 10.0<br>(7.8–11.2)                                                    | 40.0<br>(26.7–50.8) | 50.0<br>(41.4–53.8) |
| <i>B. luxuriosae</i> (PF)          | 5 | 280.2 ± 14.7                     | 11.3<br>(9.5–12.3)                                                    | 39.1<br>(37.1–41.5) | 49.6<br>(46.5–51.9) |
| <i>B. rainulfi</i>                 | 5 | 203.7 ± 5.9                      | 16.7<br>(14.5–18.9)                                                   | 30.0<br>(26.9–34.7) | 53.3<br>(46.4–58.0) |
| <i>Bursaphelenchus</i> sp.         | 5 | 247.4 ± 12.2                     | 12.5<br>(10.6–16.4)                                                   | 34.3<br>(27.1–46.3) | 53.2<br>(43.1–62.4) |
| <i>Parasitaphelenchus</i> sp.      | 5 | 260.3 ± 15.7                     | 8.3<br>(6.8–9.7)                                                      | 91.7<br>(90.3–93.2) |                     |

PM = parasitic male; PF = parasitic female; EPI = epicuticle; CZ = cortical zone; BZ = basal zone. No significant differences were seen in cuticle thickness or the ratio between cuticle zones among species ( $P < 0.05$ ). *Parasitaphelenchus* sp. was excluded from the percentage data comparison because of its structural differences from *Bursaphelenchus* spp.

<https://doi.org/10.1371/journal.pone.0179465.t002>

striated zone is thought to be involved with movement and locomotion, because this zone is closest to the body wall muscle [51, 53–55].

In *B. xylophilus*, a well-developed basal striated zone is considered to play an important role in nematode–vector interactions [49, 56]. When phoretic (dispersal stage) juveniles of *B. xylophilus* migrate to the body of a vector beetle, the nematodes appear on the surface wall of a vector's pupal chamber and then climb up the protruded part of the chamber wall to attach to the body of the teneral adult. Then they move into the tracheal system through the spiracles [57].

In the present study, a well-developed basal striated zone is confirmed in *Bursaphelenchus* spp. individuals that were recovered from the tracheal systems of Lamiini longhorn beetles or the backs of elytra of bark beetles. Although the associated organs are different, the mechanism of entry of nematodes into vector is hypothesized to be similar, i.e., they crawl up to teneral adults in the vectors' pupal chambers. Thus, a well-developed basal striated zone (high mobility), is required for this cascade of activities.

Although the environmental conditions facing nematodes may be different for the associates longhorn and bark beetle, each insect associate is hypothesized to be exposed to strong desiccation. The associates of longhorn beetle have to migrate up tree surfaces until they enter into the wood tissue through a feeding wound or an oviposition mark made by the insect [17, 58–60]. They are exposed to strong desiccation during departure from the vector. On the other hand, bark beetles emerge from dead trees; fly to and invade new host trees; mate, construct galleries, and start laying eggs inside trees [61]. Therefore, the associates of bark beetle are not exposed to strong desiccation stress during departure from the vector. However, during the vector's flight, the associates of bark beetle that stick to the backs of elytra are exposed to highly desiccating conditions.

With regard to phylogenetic relationships, the bark beetle associated *Bursaphelenchus* spp. are more basal than longhorn beetle associates (Fig 1). Thus, mobility and tolerance to desiccation provided by a well-developed basal striated zone in the associates of bark beetle is likely an ancestral (apomorphic) characteristic, serving as a kind of preadaptation for cerambycid host invasion.

The adult forms of *B. luxuriosae* (and its tentative sister species, *B. doui*) were hypothesized to be “parasitic,” because they (1) were isolated from body cavity and (2) seemed active within the insect body, although obvious damage to insects was not confirmed [44, 45]. However, in the present study, the adult forms were mostly isolated from the tracheal systems and had a similar body cuticle structure as dauer juveniles, which was clearly different from the parasitic juveniles of *Parasitaphelenchus* sp. Therefore, although more detailed nutritional and physiological analyses are necessary, the insect-dependent adult forms of *B. luxuriosae* (and *B. doui*) may be phoretic rather than parasitic.

By contrast, the parasitic juveniles of *Parasitaphelenchus* sp. had no striated basal zone. This is probably because strong mobility and desiccation tolerance are not necessary for the parasitic form, settled in the hemocoel. However, if the parasitic (infective) juveniles enter the insect body as *Bursaphelenchus* dauers do, they must attach itself to the beetle body and enter the hemocoel. A possible explanation is that parasitic juveniles lose the basal striated zone after invasion. The juveniles show active movement during invasion, but after invasion, active movement and desiccation tolerance are unnecessary if they can avoid the host immune system, because they are assumed to float in the hemolymph. This fits well with our behavioral observations. *Bursaphelenchus* dauers are known to move actively after entering the vector body [62, 63], and they showed active movement immediately after insect dissection in the present study. It suggests that they may depart from their vectors at any time, which is difficult to predict. By contrast, the parasitic juveniles did not move immediately after host dissection,

and not all individuals started moving within a day, suggesting that juveniles that moved into a vector's intestine may need a certain period of "preparation time" to acquire mobility.

The structure of the nematode body cuticle is highly plastic [9] and is known to change before the stage of molting in many species. For example, the body cuticle of the first-stage juvenile of a human parasite filaria, *Wuchereria bancrofti*, loses the fiber zone found in early ontogenesis at the same stage [64], and infective juveniles of a root knot nematode, *Meloidogyne javanica*, lose the basal striation within a week of becoming a parasitic juvenile [51]. Similarly, second juveniles of a potato cyst nematode, *Globodera rostochiensis*, lose basal striation once the juveniles set up a feeding site [54]. Therefore, in the *Parasitaphelenchus* sp., it is quite probable that the basal striated zone is present before invasion and disappears after invasion.

The surface coat, the outermost layer of the epicuticle, is faintly stained and unclear in *Parasitaphelenchus* sp., while that of *Bursaphelenchus* spp. is relatively clear. This is likely because *Parasitaphelenchus* sp. has a chemically different surface coat from *Bursaphelenchus* spp., which streams away from the surface of the *Parasitaphelenchus* sp. during chemical fixation. Generally, in parasitic nematodes, the surface coat is involved in functions such as interacting with host immune defenses. For example, infective juveniles of the parasitic nematode *Toxocara canis* have mucins on their surface [65]. Because mucins are present on the luminal surface of host endothelial cells, it is possible that the surface coat disguises infective larvae, effectively evading the host immune system. A CuZn superoxide dismutase secreted by, and present on the surfaces of, adult male and female *Brugia pahangi* is presumed to neutralize superoxides generated by leukocytes, thereby contributing to parasite survival in its host by acting as an antioxidant factor [66]. Although further chemical and enzymatic studies are needed, the specific surface coat of *Parasitaphelenchus* sp. may similarly reflect adaptation to living in hemocoel.

*Parasitaphelenchus* spp. were reported to invade hosts as third-stage (infective) juveniles and molt to fourth-stage (parasitic) juveniles, enlarging considerably [28–30]. However, in this study, all *Parasitaphelenchus* sp. obtained from host beetles were the third-stage parasitic juveniles, and they molted to the fourth-stage mycophagous juveniles on fungal lawn. This result suggests that *Parasitaphelenchus* sp. have a different life cycle from other *Parasitaphelenchus* spp. Thus, it will be interesting to compare the body cuticle structures of third-stage (parasitic) juveniles of this *Parasitaphelenchus* sp. with third-stage (infective) and fourth-stage (parasitic) juveniles of other *Parasitaphelenchus* spp.

Phylogenetically, *Parasitaphelenchus* belong to clade 2 of *Bursaphelenchus* spp. (Fig 1). This means that the parasitism and cuticular structures of *Parasitaphelenchus* are believed to have derived from the fungal feeding/insect-dependent phoretic life history of *Bursaphelenchus* spp. Furthermore, several other *xylophilus* group species (clade 3) have parasitic juveniles [67, 68]. This suggests that insect parasitism has evolved independently at least twice in this subfamily. A detailed comparison among those parasitic juveniles will provide a better understanding of the convergence/divergence of the parasitic structures of parasitaphelenchids and other parasites. The drastic differences in cuticular structures found in the present study may represent nematode plasticity, one of the most important factors for their diversification.

## Acknowledgments

The authors sincerely thank Ms. Noriko Shimoda and Ms. Atsuko Matsumoto, FFPRI, for their technical assistance in the culturing and molecular studies, respectively. The authors also thank Hayato Masuya, Tohoku Research Center, FFPRI, Yosuke Degawa, University of Tsukuba and Dr. Toshiharu Akino, Kyoto Institute of Technology for their assistance in insect collection and identification.

## Author Contributions

**Conceptualization:** TE TY YT NK.

**Data curation:** TE NK.

**Formal analysis:** TE NK.

**Funding acquisition:** YT NK.

**Investigation:** TE NK.

**Methodology:** TE TY NK.

**Project administration:** TY NK.

**Resources:** TY YT NK.

**Supervision:** NK.

**Validation:** TE NK.

**Visualization:** TE NK.

**Writing – original draft:** TE NK.

**Writing – review & editing:** TE TY YT NK.

## References

1. Manton S M, Ramsay JA (1937) Studies on the Onychophora. *J Exp Biol* 14: 470–472.
2. Hadley NF (1984) Cuticle: Ecological significance. In: Bereiter-Hahn J, Matoltsy AG, Richards KS eds. *Biology of the integument I. Invertebrates*. Berlin: Springer, pp 685–693.
3. Wright JC (1989) The tardigrade cuticle II. Evidence for a dehydration-dependent permeability barrier in the intracuticle. *Tissue Cell* 21: 263–279. PMID: [18620263](#)
4. Chitwood BG (1936) Observations on the chemical nature of the cuticle of *Ascaris lumbricoides* var. *suvis*. *Proc Helminthol Soc Wash* 3: 39–49.
5. Cox GN, Kusch M, Edgar RS (1981) Cuticle of *Caenorhabditis elegans*: its isolation and partial characterization. *J Cell Biol* 90: 7–17. PMID: [7251677](#)
6. Bird AF, Bird J (1991) *The structure of nematode*. San Diego: Academic Press. 316 p.
7. Bird AF, Stynes BA (1981) The life cycle of *Anguina agrostis*: development in host plant. *Int J Parasitol* 11: 431–440.
8. Edgar RS, Cox GN, Kusch M, Politz JC (1982) The cuticle of *Caenorhabditis elegans*. *J Nematol* 14: 248–258. PMID: [19295706](#)
9. Decraemer W, Karanastasi E, Brown D, Backeljau T (2003) Review of the ultrastructure of the nematode body cuticle and its phylogenetic interpretation. *Biol Rev Camb Philos Soc* 78: 465–510. PMID: [14558593](#)
10. Wharton DA (1986) *A functional biology of nematodes*. London: Croom Helm. 192 p.
11. Ryss A, Vieira P, Mota M, Kulinich O (2005) A synopsis of the genus *Bursaphelenchus* Fuchs, 1937 (Aphelenchida: Parasitaphelenchidae) with keys to species. *Nematology* 7: 393–458.
12. Kanzaki N, Giblin-Davis RM (2012) Aphelenchoidea. In: Manzanilla-López R. H. & Marbán-Mendoza N. (Eds). *Practical plant nematology*, México, Biblioteca básica de agricultura, pp. 161–208.
13. Kanzaki N, Giblin-Davis RM (2016) Pine wilt and red ring, lethal plant diseases caused by insect-mediated *Bursaphelenchus* nematodes. In: Brown JK ed. *Vector-mediated transmission of plant pathogens*. St. Paul, MN: APS Press, pp 87–107.
14. Kanzaki N, Giblin-Davis RM, Carrillo D, Duncan R, Gonzalez R (2014) *Bursaphelenchus penaini* sp. (Tylenchomorpha: Aphelenchoididae), a phoretic associate of ambrosia beetles (Coleoptera: Scolytinae) from avocado in Florida. *Nematology* 16: 683–693.
15. Griffith R (1987) Red ring disease of coconut palm. *Plant Disease* 71, 193–196.

16. Tanaka SE, Tanaka R, Akiba M, Aikawa T, Maehara N, Takeuchi Y, et al. (2014) *Bursaphelenchus niphades* n. sp. (Tylenchina: Aphelenchoididae) amensally associated with *Niphades variegatus* (Roelofs) (Coleoptera: Curculionidae). *Nematology* 16: 259–281.
17. Mamiya Y, Enda N (1972) Transmission of *Bursaphelenchus lignicolus* (Nematoda: Aphelenchoididae) by *Monochamus Alternatus* (Coleoptera: Cerambycidae). *Nematologica* 18: 159–162.
18. Kanzaki N, Tsuda K, Futai K (2000) Description of *Bursaphelenchus conicaudatus* n. sp. (Nematoda: Aphelenchoididae), isolated from the yellow-spotted longicorn beetle, *Psacotha hilaris* (Coleoptera: Cerambycidae) and fig trees, *Ficus carica*. *Nematology* 2: 165–168.
19. Kanzaki N, Futai K (2003) Description and phylogeny of *Bursaphelenchus luxuriosae* n. sp. (Nematoda: Aphelenchoididae) isolated from *Acalolepta luxuriosa* (Coleoptera: Cerambycidae). *Nematology* 5: 565–572.
20. Giblin-Davis RM, Kanzaki N, Ye W, Mundo-Ocampo M, Baldwin JG, Thomas WK (2006) Morphology and description of *Bursaphelenchus platzeri* n. sp. (Nematoda: Parasitaphelenchidae), an associate of nitidulid beetles. *J Nematol* 38: 150–157. PMID: 19259440
21. Kanzaki N, Taki H, Masuya H, Okabe K (2012) *Bursaphelenchus tadamiensis* n. sp. (Nematoda: Aphelenchoididae), isolated from a stag beetle, *Dorcus striatipennis* (Coleoptera: Lucanidae), from Japan. *Nematology* 14: 223–233.
22. Giblin-Davis RM, Mundo-Ocampo M, Baldwin JG, Norden BB, Batra SWT (1993) Description of *Bursaphelenchus abruptus* n. sp. (Nematoda: Aphelenchoididae), an associate of digger bee. *J Nematol* 25: 161–172. PMID: 19279754
23. Giblin-Davis RM, Hazir S, Center BJ, Ye W, Keskin N, Thorp RT, et al. (2005) *Bursaphelenchus anatolius* n. sp. (Nematoda: Parasitaphelenchidae), an associate of bees in the genus *Halictus*. *J Nematol* 37: 336–342. PMID: 19262882
24. Braasch H, Schmutzenhofer H (2000) *Bursaphelenchus abietinus* sp. n. (Nematoda: Parasitaphelenchidae) associated with fir bark beetles (*Pityokteines* spp.) from declining silver fir trees in Australia. *Russ J Nematol* 8: 1–6.
25. Shimizu A, Tanaka R, Akiba M, Masuya H, Iwata R, Fukuda K, et al. (2013) Nematodes associated with *Dryocoetes uniseriatus* Eggers (Coleoptera: Scolytidae). *Envir Entomol* 42: 79–88.
26. Giblin RM, Kaya HK (1983) *Bursaphelenchus seani* n. sp. (Nematoda: Aphelenchoididae), a phoretic associate of *Anthophora bomboidea stanfordidana* Cockerell, 1904 (Hymenoptera: Anthophoridae). *Rev Nematol* 7: 177–189.
27. Giblin RM, Swan JL, Kaya HK (1984) *Bursaphelenchus kivini* n. sp. (Aphelenchida: Aphelenchoididae), an associate of bees in the genus *Halictus* (Hymenoptera: Halictidae). *Rev Nematol* 6: 39–50.
28. Saunders JL, Norris DM (1961) Nematode parasites associates of the smaller European elm bark beetle, *Scolytus multistriatus* (Marsham). *Ann Entomol Soc Am* 54: 792–798.
29. Hunt DJ, Hague NGM (1974) Redescription of *Parasitaphelenchus oldhami* Rühm, 1956 (Nematoda: Aphelenchoididae) a parasite of two elm bark beetles: *Scolytus scolytus* and *S. multistriatus*, together with some notes on its biology. *Nematologica* 20: 174–180.
30. Hunt DJ (1993) *Aphelenchida, Longidoridae and Trichodoridae: Their systematics and bionomics*. Wallingford, : CAB International. 352 p.
31. Kikuchi T, Aikawa T, Oeda Y, Karim N, Kanzaki N (2009) A rapid and precise diagnostic method for detecting the pinewood nematode *Bursaphelenchus xylophilus* by loop-mediated isothermal amplification. *Phytopathology* 99: 1365–1369. <https://doi.org/10.1094/PHYTO-99-12-1365> PMID: 19900002
32. Tanaka R, Kikuchi T, Aikawa T, Kanzaki N (2012) Simple and quick methods for nematode DNA preparation. *Appl Entomol Zool* 47: 291–294.
33. Kanzaki N, Futai K (2002) A PCR primer set for determination of phylogenetic relationships of *Bursaphelenchus* species within the *xylophilus* group. *Nematology* 4: 35–41.
34. Ye W, Giblin-Davis RM, Braasch H, Morris K, Thomas WK (2007) Phylogenetic relationships among *Bursaphelenchus* species (Nematoda: Parasitaphelenchidae) inferred from nuclear ribosomal and mitochondrial DNA sequence data. *Mol Phylogenet Evol* 43: 1185–1197. <https://doi.org/10.1016/j.ympev.2007.02.006> PMID: 17433722
35. Katoh K, Misawa K, Kuma K, Miyata T (2002) MAFFT: a novel method for rapid multiple sequence alignment based on fast Fourier transform *Nucleic Acids Res* 30: 3059–3066. PMID: 12136088
36. Posada D, Crandall KA (1998) Modeltest: testing the model of DNA substitution. *Bioinformatics* 14: 817–818. PMID: 9918953
37. Huelsenbeck JP, Ronquist F (2001) MrBayes: inference of phylogenetic trees. *Bioinformatics* 17: 754–755. PMID: 11524383



38. Ronquist F, Huelsenbeck JP (2003) MrBAYES3: Bayesian phylogenetic inference under mixed models. *Bioinformatics* 19: 1572–1574. PMID: [12912839](#)
39. Larget B, Simon DL (1999) Markov chain Monte Carlo algorithms for the Bayesian analysis of phylogenetic trees. *Mol Biol Evol* 16: 750–759.
40. Guindon S, Dufayard JF, Lefort V, Anisimova M, Hordijk W, Gascuel O (2010) New algorithms and methods to estimate maximum-likelihood phylogenies: assessing the performance of PhyML 3.0. *Syst Biol* 59: 307–321. <https://doi.org/10.1093/sysbio/syq010> PMID: [20525638](#)
41. Kadoya Y (2010) [The practical method for ultrathin sectioning]. *Integrated imaging research support* (Eds). Tokyo: Nishimura shoten. 111p.
42. Rasband WS (2014) ImageJ, U. S. National Institutes of Health, Bethesda, Maryland, USA. <http://imagej.nih.gov/ij/> (accessed March 22, 2017)
43. Poinar GO (1975) *Entomogenous nematodes: a manual and host list of insect-nematode associations*. Leiden: E.J. Brill. 317 p.
44. Kanzaki N, Maehara N, Aikawa T, Giblin-Davis RM (2009) The first report of a putative “entomoparasitic adult form” in *Bursaphelenchus*. *J Parasitol* 95: 113–119. <https://doi.org/10.1645/GE-1633.1> PMID: [18576884](#)
45. Kanzaki N, Maehara N, Aikawa T, Nakamura K (2013) An entomoparasitic adult form in *Bursaphelenchus doui* (Nematoda: Tylenchomorpha) associated with *Acalolepta fraudatrix*. *J Parasitol* 99: 803–815. <https://doi.org/10.1645/GE-3253.1> PMID: [23656462](#)
46. Mamiya Y (1975) The life history of the pine wood nematode, *Bursaphelenchus lignicolus*. *Jpn J Nematol* 5: 16–25.
47. Kanzaki N, Futai K (2001) Life history of *Bursaphelenchus conicaudatus* (Nematoda: Aphelenchoididae) in relation to the yellow-spotted longicorn beetle, *Psacothaea hilaris* (Coleoptera: Cerambycidae). *Nematology* 3: 473–479.
48. Braasch H (2001) *Bursaphelenchus* species in conifers in Europe: distribution and morphological relationships. *EPPO Bull* 31: 127–142.
49. Kondo E, Ishibashi N (1978) Ultrastructural differences between the propagative and dispersal forms in pine wood nematode, *Bursaphelenchus lignicolus*, with reference to the survival. *Appl Entomol Zool* 13: 1–11.
50. Lee DL (1966) An electron microscope study of the body wall of the third-stage larva of *Nippostrongylus brasiliensis*. *Parasitology* 56: 127–135. PMID: [5912223](#)
51. Bird AF (1968) Changes associated with parasitism in nematodes. Ultrastructure of the egg shell, larval cuticle, and contents of the subventral esophageal glands in *Meloidogyne javanica*, with some observations on hatching. *J Parasitol* 54: 475–489.
52. Neuhaus B., Bresciani J., Christensen C. M. & Frandsen F. (1996). Ultrastructure and development of the body cuticle of *Oesophagostomum dentatum* (Strongylida, Nematoda). *J Parasitol* 82: 820–828. PMID: [8885894](#)
53. Wisse E, Daems WT (1968) Electron microscopic observations on second-stage larvae of the potato root eelworm *Heterodera rostochiensis*. *J Ultrastruct Res* 24: 210–231. PMID: [5704879](#)
54. Jones JT, Perry RN, Johnston MRL (1993) Changes in the ultrastructure of the cuticle of the potato cyst nematode, *Globodera rostochiensis*, during development and infection. *Fundam Appl Nematol* 16: 433–445.
55. Burr AHJ, Robinson AF (2004) Locomotion behavior. In: Gaugler R Bilgrami AL eds. *Nematode behavior*, Wallingford: CAB International. pp 25–62.
56. Kondo E, Ishibashi N (1989) Ultrastructural characteristics of the infective juveniles of *Steinernema* spp. (Rhabditida: Steinernematidae) with reference to their motility and survival. *Appl Entomol Zool* 24: 103–111.
57. Aikawa T (2008) Transmission biology of *Bursaphelenchus xylophilus* in relation to its insect vector. In: Zhao BG, Futai K, Sutherland JR, Takeuchi Y eds. *Pine wilt disease*. Tokyo: Springer Japan. pp 123–161.
58. Wingfield MJ (1983) Transmission of pine wood nematode to cut timber and girdled trees. *Plant Dis* 67: 35–37.
59. Wingfield MJ, Blanchette RA (1983) The pine-wood nematode, *Bursaphelenchus xylophilus*, in Minnesota and Wisconsin: insect associates and transmission studies. *Can J For Res* 13: 1068–1076.
60. Linit MJ (1988) Nematode-vector relationships in the pine wilt disease system. *J Nematol* 20: 227–235. PMID: [19290206](#)
61. Wood SL (1982) The bark and ambrosia beetles of north and central America (Coleoptera: Scolytidae), a taxonomic monograph. *Great Basin Nat Memoires* 6: 1–1359.

62. Kondo E (1986) SEM observations on the intratracheal existence and cuticle surface of the pine wood nematode, *Bursaphelenchus xylophilus*, associated with the Cerambycid beetle, *Monochamus carolinensis*. *Appl Entomol Zool* 21: 340–346.
63. Aikawa T, Togashi K (2000) Movement of *Bursaphelenchus xylophilus* (Nematoda: Aphelenchoididae) in tracheal system of adult *Monochamus alternatus* (Coleoptera: Cerambycidae). *Nematology* 2: 495–500.
64. Weber P (1984) Electron microscope study on the developmental stages of *Wuchereria bancrofti* in the intermediate host: structure of the body wall. *Tropenmed Parasitol* 35: 221–230. PMID: [6395455](#)
65. Gems D, Maisels RM (1996) An abundantly expressed mucin-like protein from *Toxocara canis* infective larvae: the precursor of the larval surface. *Proc Natl Acad Sci USA* 93: 1665–1670. PMID: [8643687](#)
66. Tang L, Ou X, Henkle-Dührsen K, Selkirk ME (1994) Extracellular and cytoplasmic CuZn superoxide dismutases from *Brugia* lymphatic filarial nematode parasites. *Infect Immun* 62: 961–967. PMID: [8112870](#)
67. Tomalak M, Worrall J, Filipiak A (2013) *Bursaphelenchus masseyi* sp. n. (Nematoda: Parasitaphelenchinae)—a nematode associate of the bark beetle, *Trypophloeus populi* Hopkins (Coleoptera: Curculionidae: Scolytinae), in aspen, *Populus tremuloides* Michx. affected by sudden aspen decline in Colorado. *Nematology* 15: 907–921.
68. Tomalak M, Pomorski JJ (2015) Description of *Bursaphelenchus piceae* sp. n. (Nematoda: Parasitaphelenchinae) from larval galleries of the six-toothed spruce bark beetle, *Pityogenes chalcographus* (L.) (Coleoptera: Curculionidae: Scolytinae), in Norway spruce, *Picea abies* (L.) Karsten. *Nematology* 17: 1165–1183.
